# Supplementary material for: Identification and Characterization of Edible Cricket Peptides on Hypertensive and Glycemic In Vitro Inhibition and Their Anti-Inflammatory Activity on RAW 264.7 Macrophage Cells
Source: PubMed Central journal article supplement (PMC7700588; doi:10.3390/nu12113588), 2020-11-23
Supplement: nutrients-12-03588-s001.pdf [file nutrients-12-03588-s001.pdf]

Supplementary Materials for  
**Identification and Characterization of Edible Cricket Peptides on Hypertensive  
and Glycemic *in vitro* Inhibition and Their Anti-Inflammatory Activity on RAW  
264.7 Macrophage Cells**

**Felicia Hall<sup>1,2</sup>, Lavanya Reddivari<sup>1</sup>, and Andrea M. Liceaga<sup>1,2\*</sup>**

<sup>1</sup>Protein Chemistry and Bioactive Peptides Laboratory; Purdue University, West Lafayette, IN, 47907, USA;

<sup>2</sup>Department of Food Science, Purdue University, 745 Agriculture Drive, West Lafayette, IN, 47907, USA; lrediva@purdue.edu

**Contact information for Corresponding Author**

\*Andrea M. Liceaga, Email: aliceaga@purdue.edu, Tel. 765-496-2460

**Supplementary Materials for this manuscript include the following:**

**Figure S1:** Representative elution profiles illustrating fractions collected from gel filtration (SEC) **(a)**, reverse phase (C18) **(b)**, and semi-preparative cation exchange (IEX) **(c)** columns. Chromatography was performed sequentially as follow: CPHD was separated by gel filtration (a); fraction S4 collected and separated by reverse-phase chromatography (b); and fraction F6 collected and separated by IEX. Elution profile monitored at 280nm.

**Table S1:** De novo peptide list, BioPEP database matches, and antihypertensive peptide prediction. Characterization parameters include de novo score, average local confidence (%) peptide abundance (area). Database searches were performed using PEAKS software. Antihypertensive peptide prediction includes SVM score, prediction (AHT or non-AHT), and amphiphilic score. Peptides searched against the BioPEP database reports the known peptide and bioactivity reported.

**Table S2:** All residues interacting with ACE (PDB 108A) for each peptides YKPRP, PHGAP, VGPPQ and known ACE inhibitor captopril.

**Table S3.** Predicted binding affinity (kJ/mol) for peptides best docked pose against ACE

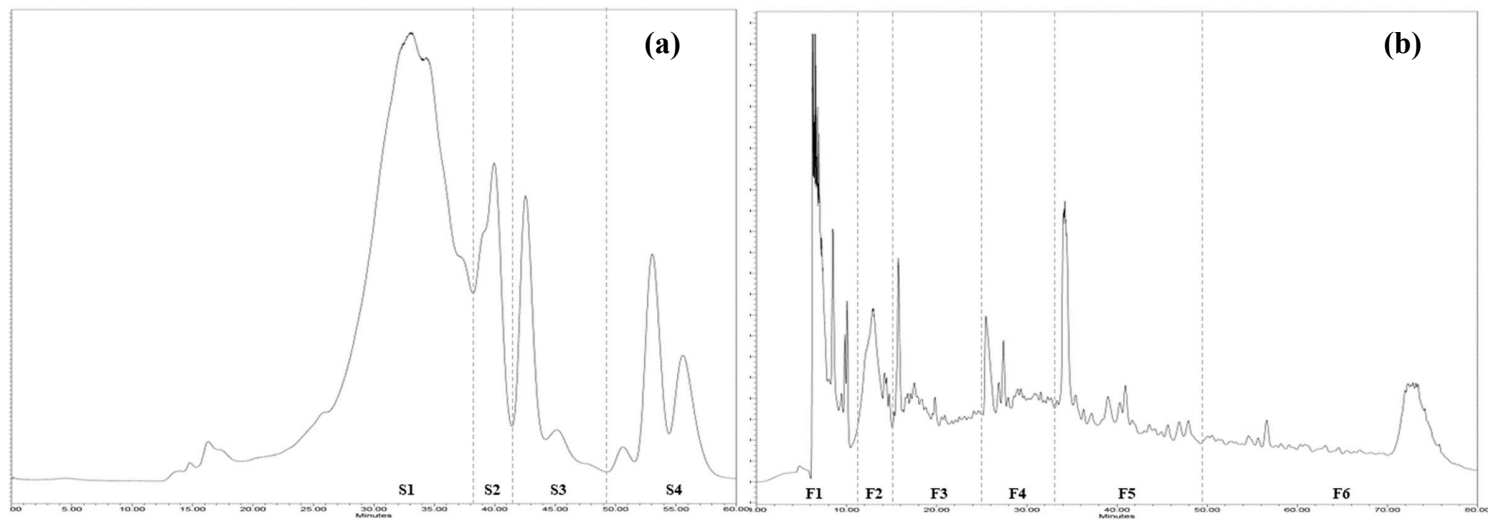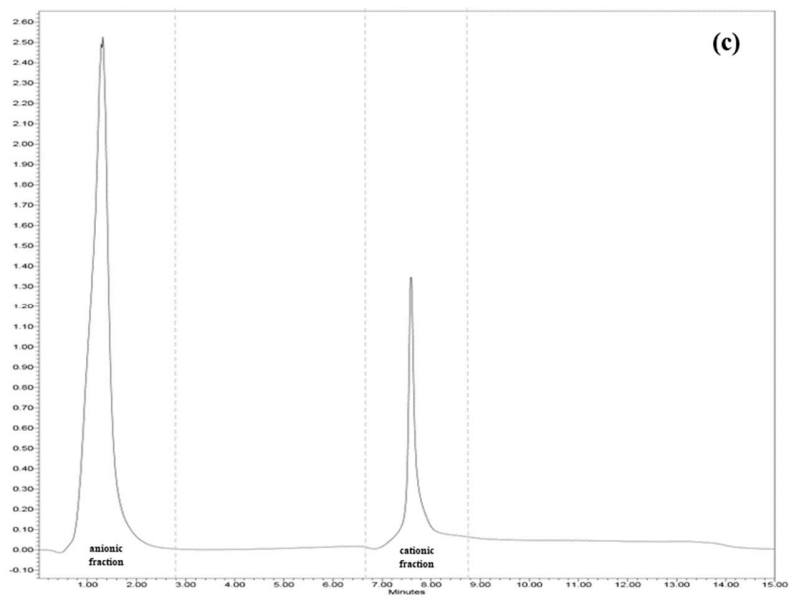

**Table S1. De novo peptide list, BioPEP database matches, and antihypertensive peptide prediction**

| Peptide Sequence | De Novo Score | ALC (%) | Area     | SVM Score | Prediction | Amphiphilicity Score | Mol wt. | Matched Peptide in BioPEP Database | Activity Reported             |
|------------------|---------------|---------|----------|-----------|------------|----------------------|---------|------------------------------------|-------------------------------|
| LPPK             | 85            | 85      | 1.76E+06 | 2.25      | AHT        | 0.92                 | 453.62  | PPK                                | ACE inhibitor                 |
| GPPK             | 81            | 81      | 3.91E+06 | 2.05      | AHT        | 0.92                 | 397.52  | GPP, PPK                           | ACE inhibitor                 |
| YKPRP            | 95            | 95      | 1.58E+06 | 2.02      | AHT        | 2.24                 | 659.84  | exact match                        | immunomodulating              |
| VLPQ             | 85            | 85      | 1.70E+07 | 1.59      | AHT        | 0.31                 | 455.6   | VLP                                | ACE inhibitor                 |
| VKLAPG           | 83            | 83      | 2.01E+07 | 1.54      | AHT        | 0.61                 | 583.8   | VKL, APG, LAP                      | DPPIV and ACE inhibitor       |
| LLPQ             | 85            | 85      | 5.00E+06 | 1.43      | AHT        | 0.31                 | 469.62  | LLP                                | ACE inhibitor                 |
| LQPL             | 89            | 89      | 4.38E+06 | 1.43      | AHT        | 0.31                 | 469.62  | LQP                                | ACE and DPP-IV inhibitor      |
| PHGAP            | 80            | 80      | 9.73E+05 | 1.35      | AHT        | 0.29                 | 477.58  | PHG                                | not specified                 |
| VGPPQ            | 92            | 92      | 1.00E+07 | 1.33      | AHT        | 0.25                 | 496.63  | GPP                                | ACE inhibition, antioxidant   |
| FVPL             | 87            | 87      | 4.10E+06 | 1.29      | AHT        | 0                    | 474.64  | FVP, VPL                           | ACE and DPPIV inhibitor       |
| VHLP             | 87            | 87      | 1.69E+06 | 1.27      | AHT        | 0.36                 | 464.61  | exact match                        | PEP inhibitor                 |
| PLVR             | 85            | 85      | 3.66E+06 | 1.27      | AHT        | 0.61                 | 483.65  | LVR                                | ACE inhibitor                 |
| LVRP             | 85            | 85      | 3.16E+07 | 1.27      | AHT        | 0.61                 | 483.65  | VRP, LVR                           | ACE inhibitor                 |
| VHLP             | 87            | 87      | 1.69E+06 | 1.27      | AHT        | 0.36                 | 464.61  | exact match                        | PEP inhibitor                 |
| FVPH             | 82            | 82      | 1.07E+07 | 1.23      | AHT        | 0.36                 | 498.63  | FVPH, FVP                          | antioxidant and ACE inhibitor |
| LVPK             | 83            | 83      | 2.54E+07 | 1.15      | AHT        | 0.92                 | 455.64  | VPK                                | ACE                           |
| LLPR             | 98            | 98      | 2.25E+07 | 1.14      | AHT        | 0.61                 | 497.67  | LLP                                | ACE                           |
| LPLR             | 95            | 95      | 2.46E+07 | 1.14      | AHT        | 0.61                 | 497.67  | LPL                                | DPPIV inhibitor               |
| LRPL             | 96            | 96      | 6.88E+07 | 1.14      | AHT        | 0.61                 | 497.67  | LRP                                | ACE inhibitor                 |
| LLPF             | 80            | 80      | 1.14E+07 | 1.12      | AHT        | 0                    | 488.66  | LLPF, LLP                          | antioxidant and ACE inhibitor |
| VGPL             | 84            | 84      | 2.72E+07 | 1.1       | AHT        | 0                    | 384.52  | GPL                                | ACE inhibitor                 |

|              |    |    |          |      |     |      |        |          |                                              |
|--------------|----|----|----------|------|-----|------|--------|----------|----------------------------------------------|
| <b>FVPK</b>  | 93 | 93 | 1.34E+06 | 1.1  | AHT | 0.92 | 489.66 | VPK, FVP | ACE inhibitor                                |
| <b>AVPL</b>  | 81 | 81 | 3.49E+06 | 1.04 | AHT | 0    | 398.54 | AVP, VPL | ACE inhibitor and<br>diproin B               |
| <b>VAPL</b>  | 88 | 88 | 1.56E+06 | 1.04 | AHT | 0    | 398.54 | VAP      | ACE inhibitor                                |
| <b>GPWL</b>  | 97 | 97 | 4.60E+05 | 1    | AHT | 1.73 | 471.61 | PWL      | synthetic peptide,<br>activity not specified |
| <b>LLAP</b>  | 82 | 82 | 2.71E+06 | 0.9  | AHT | 0    | 412.56 | LAP      | DPPIV inhibitor                              |
| <b>QLGPL</b> | 83 | 83 | 3.24E+07 | 0.8  | AHT | 0.25 | 526.69 | LGP      | not specified                                |

**Table S2. All residues interacting with ACE (PDB 108A) for each peptides YKPRP, PHGAP, VGPPQ and known ACE inhibitor captopril.**

| <b>Interaction Type</b> | <b>Captopril</b> | <b>YKPRP</b> | <b>PHGAP</b> | <b>VGPPQ</b> |
|-------------------------|------------------|--------------|--------------|--------------|
| <b>H-Bond</b>           | Gln281           | Asn66        | Glu411       | Ala354       |
|                         | Tyr523           | Asn136       | Ala356       | Glu384       |
|                         | Lys511           | His353 (2)   | Tyr523       | Arg522       |
|                         | Tyr520           | Ala354       | Gln281       | Ser516       |
|                         | His353           | Ala356       | Tyr520       | Glu411       |
|                         | His513           | Glu411       | His353       |              |
|                         |                  | Glu403 (2)   | His513       |              |
|                         |                  | Arg402       | Ala354       |              |
|                         |                  | Ser516       |              |              |
|                         |                  | Tyr523       |              |              |
| <b>Vdw</b>              | Ser355           | Asn70        | His410       | Tyr69        |
|                         | Glu348           | Leu81        | Asn66        | His353       |
|                         | Ala354           | Leu80        |              | His383       |
|                         | Phe527           | Arg124       |              | His513       |
|                         |                  | Tyr62        |              | Val518       |
|                         |                  | Phe391       |              | Ala356       |
|                         |                  | Asp358       |              | Lys368       |
|                         |                  | Tyr394       |              | Arg124       |
|                         |                  | His410       |              | Tyr62        |
|                         |                  | His513       |              | Leu139       |
|                         |                  | His383       |              | Asn70        |
|                         |                  | Arg522       |              | Asn66        |
|                         |                  | His387       |              | His387       |
| <b>Other</b>            | Phe457           | Leu139       | Trp357       | Phe512       |
|                         | His383           | Leu140       | His383       | Val351       |
|                         |                  | Glu143       | Phe457       | Trp357       |

**Table S3. Predicted binding affinity (kJ/mol) for peptides best docked pose against ACE**

| <b>Peptide Sequence</b> | <b>Binding Affinity (kJ/mol)</b> |
|-------------------------|----------------------------------|
| LPPK                    | -31.7984                         |
| GPPK                    | -31.7984                         |
| <b>YKPRP*</b>           | <b>-39.748</b>                   |
| VLPQ                    | -32.6352                         |
| VKLAPG                  | -35.1456                         |
| LLPQ                    | -33.0536                         |
| LQPL                    | -37.2376                         |
| <b>PHGAP*</b>           | <b>-37.656</b>                   |
| <b>VGPPQ*</b>           | <b>-35.564</b>                   |
| FVPL                    | -33.0536                         |
| VHLP                    | -36.4008                         |
| PLVR                    | -35.9824                         |
| LVRP                    | -36.8192                         |
| VHLP                    | -37.2376                         |
| FVPH                    | -31.7984                         |
| LVPK                    | -35.564                          |
| LLPR                    | -33.472                          |
| LPLR                    | 33.8904                          |
| LRPL                    | 35.1456                          |

\*Peptides with the most favorable bonding interactions with ACE active site regions and/or with Zn (II) ions
